# Supplementary material for: Fabrication of high-efficiency Cu2(Zn,Cd)SnS4 solar cells by a rubidium fluoride assisted co-evaporation/annealing method
Source: Royal Society of Chemistry journal article supplement (doi:10.1039/d1ta07775a), 2021-01-01
Supplement: d1ta07775a1.pdf [file d1ta07775a1.pdf]

1 **Supporting Information**

2

3 **Rubidium Fluoride Assisted High-efficiency  $\text{Cu}_2(\text{Zn,Cd})\text{SnS}_4$  Solar Cells by**

4 **Co-evaporation/annealing Method**

5 Shijin Wang<sup>a,b</sup>, Lan Huang<sup>b</sup>, Zi Ye<sup>b</sup>, Lan Zhong<sup>b</sup>, Guilin Chen<sup>c,\*</sup>, Jianmin Li<sup>a,\*</sup>, and Xudong Xiao<sup>a,b,\*</sup>

6 a: School of Physics and Technology, Wuhan University, Wuhan 430072, China.

7 b: Department of Physics, The Chinese University of Hong Kong, Shatin 999077, Hong Kong.

8 c: College of Physics and Energy, Fujian Normal University, Fuzhou 350007, China.

9 E-mail: ljmphy@whu.edu.cn, glchen@fjnu.edu.cn, xdxiao@phy.cuhk.edu.hk, xdxiao@whu.edu.cn.

10 Corresponding authors: Jianmin Li (Dr. Li), Guilin Chen (Prof. Chen), Xudong Xiao (Prof. Xiao)

12 **Literature reviews**

13 **Table S1** Parameters of Rb-doped kesterite solar cells.

| Alkali                                    | Absorber | Comparison | <i>PCE</i> (%) | $V_{OC}$ (V) | <i>FF</i> (%) | $J_{SC}$ (mA/cm <sup>2</sup> ) | Ref |
|-------------------------------------------|----------|------------|----------------|--------------|---------------|--------------------------------|-----|
| RbF:<br>Rb doped<br>absorber target       | CZTSSe   | undoped    | 6.25           | 300.4        | 62.6          | 33.2                           | 1   |
|                                           |          | doped      | 8.41           | 317          | 70.2          | 37.8                           |     |
| RbCl:<br>Solution-based                   | CZTSSe   | undoped    | 4              | N/A          | N/A           | N/A                            | 2   |
|                                           |          | doped      | 6.35           | 360          | 49.9          | 35.2                           |     |
| RbOH·xH <sub>2</sub> O:<br>Solution-based | CZTSSe   | undoped    | 4.13           | 407          | 41.32         | 24.56                          | 3   |
|                                           |          | doped      | 5.41           | 401          | 53.2          | 25.39                          |     |
| RbF:<br>Solution-based                    | CZTSSe   | undoped    | 6.4            | 426.0        | 48.5          | 30.8                           | 4   |
|                                           |          | doped      | 5.7            | 441.1        | 44            | 29.6                           |     |

14 Interestingly, the impacts of Rb-doping are still unclear. In reference [1], [2], and [3], one can see an  
 15 improvement in efficiency after Rb-doping. Nevertheless, the change of performance parameters is not in the  
 16 same direction. For example, in reference [1], it is clear that  $V_{OC}$ ,  $J_{SC}$ , and *FF* all are improved after Rb  
 17 incorporation, while in reference [3], the  $V_{OC}$  decreases. More impressively, the Rb-doping in reference [4]  
 18 shows a negative effect on device performance with an improved  $V_{OC}$ . All these works indicate that the role  
 19 of Rb in CZTSSe is complicated.

21 **Table S2** Efficiency evolution based on pure sulfide CZTS solar cells fabricated by thermal evaporation  
 22 method in recent ten years.

| Years | Efficiency (%) | Ref |
|-------|----------------|-----|
| 2010  | 4.1            | 5   |
| 2010  | 6.81           | 6   |
| 2011  | 8.4            | 7   |
| 2014  | 2.56           | 8   |
| 2015  | 2.72           | 9   |
| 2015  | 4.61           | 10  |
| 2016  | 5.23           | 11  |
| 2017  | 2.25           | 12  |
| 2018  | 8.98           | 13  |
| 2019  | 5.6            | 14  |
| 2020  | 7.28           | 15  |
| 2020  | 8.31           | 16  |
| 2021  | 0.61           | 17  |

23 **Sn concentration optimization**

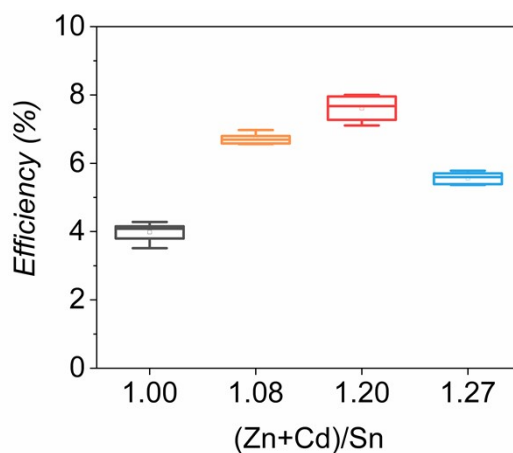

24

25 **Figure S1** Device efficiency statistics for CCZTS solar cells with different Sn concentrations.

27 **Cd concentration optimization**

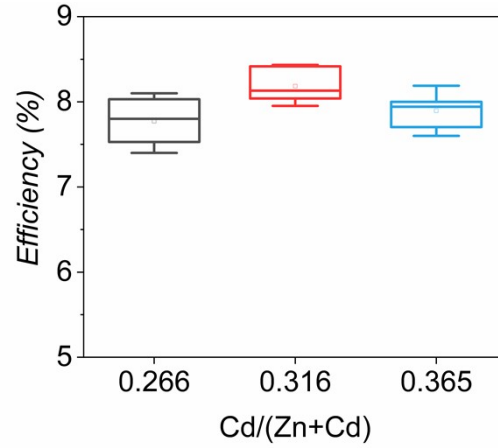

28

29 **Figure S2** Device efficiency statistics for CCZTS solar cells with different Cd concentrations.

30 **The substrate temperature optimization for precursor**

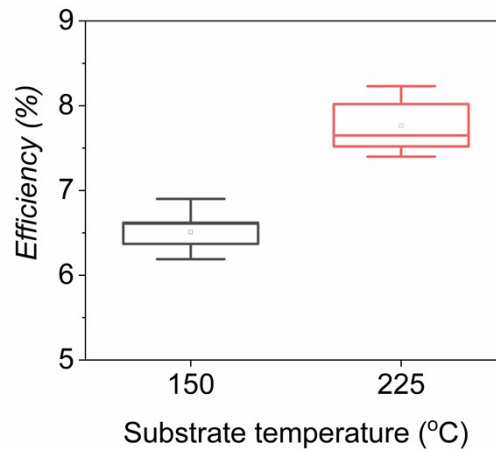

31

32 **Figure S3** Device efficiency statistics for CCZTS solar cells with precursors deposited under different

33 substrate temperatures.

### 35 Post-annealing treatment process optimization

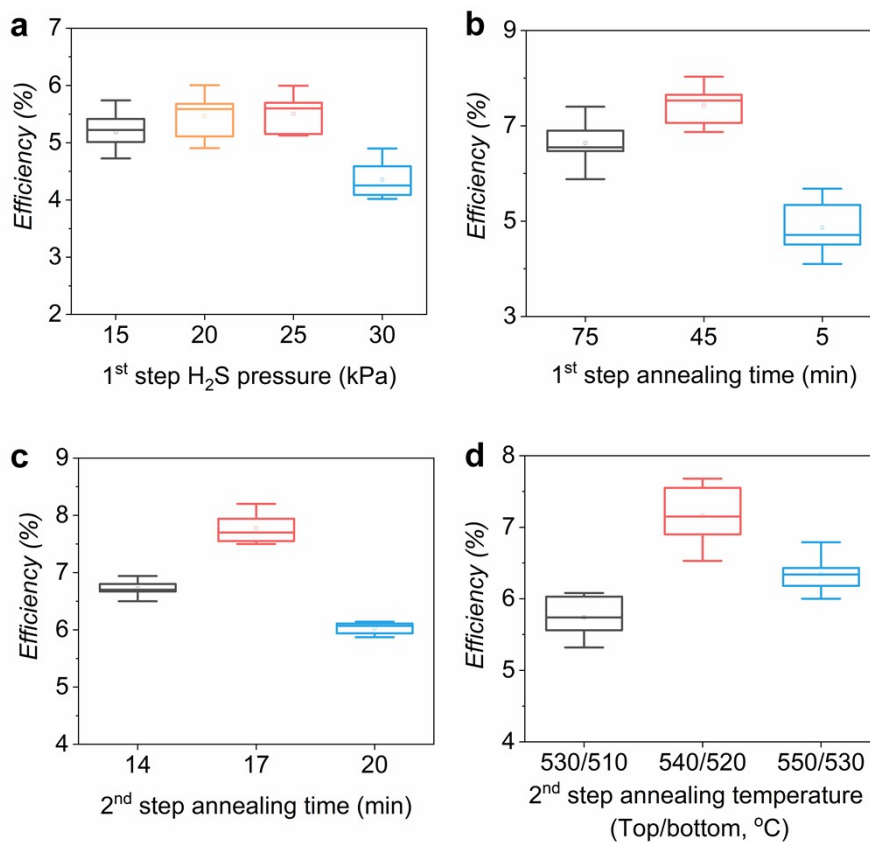

36

37 **Figure S4** Device efficiency statistics for CCZTS solar cells related to (a) 1<sup>st</sup> step H<sub>2</sub>S pressure, (b) 1<sup>st</sup> step  
 38 **annealing time**, (c) 2<sup>nd</sup> step annealing time, and (d) 2<sup>nd</sup> step annealing temperature.

### 39 Composition information of films

40 **Table S3** Composition information of the absorbers under different Rb source temperatures.

| RbF source temperature | Cd/(Cd+Zn) | (Cd+Zn)/Sn | Cu/(Cd+Zn+Sn) | Rb/(Rb+Cu) | Denotation |
|------------------------|------------|------------|---------------|------------|------------|
| control                | 0.32       | 1.17       | 0.74          | 0          | control    |
| 450°C                  | 0.33       | 1.21       | 0.74          | 0.53%      | Rb-0.53%   |
| 460°C                  | 0.33       | 1.21       | 0.73          | 0.87%      | Rb-0.87%   |
| 470°C                  | 0.33       | 1.19       | 0.73          | 1.19%      | Rb-1.19%   |
| 500°C                  | 0.33       | 1.18       | 0.75          | 2.16%      | Rb-2.16%   |

41

42 For all absorbers, the ratios of Cd/(Cd+Zn), (Cd+Zn)/Sn, and Cu/(Cd+Zn+Sn) are controlled within narrow  
 43 ranges of 0.32-0.33, 1.17-1.21, and 0.73-0.75, respectively. As expected, with the increasing RbF source

44 temperature, the Rb/(Rb+Cu) ratio increases. In this work, the Rb/(Rb+Cu) ratio is controlled from 0 to 2.16%  
 45 after washing away the extra Rb on the crystallized CCZTS surface. For clear expression, the samples with  
 46 RbF cap layer under 450°C, 460°C, 470°C and 500°C are denoted as “Rb-0.53%”, “Rb-0.87%”, “Rb-1.19%”,  
 47 and “RbF-2.16%”, respectively.

48

## 49 SIMS measurement

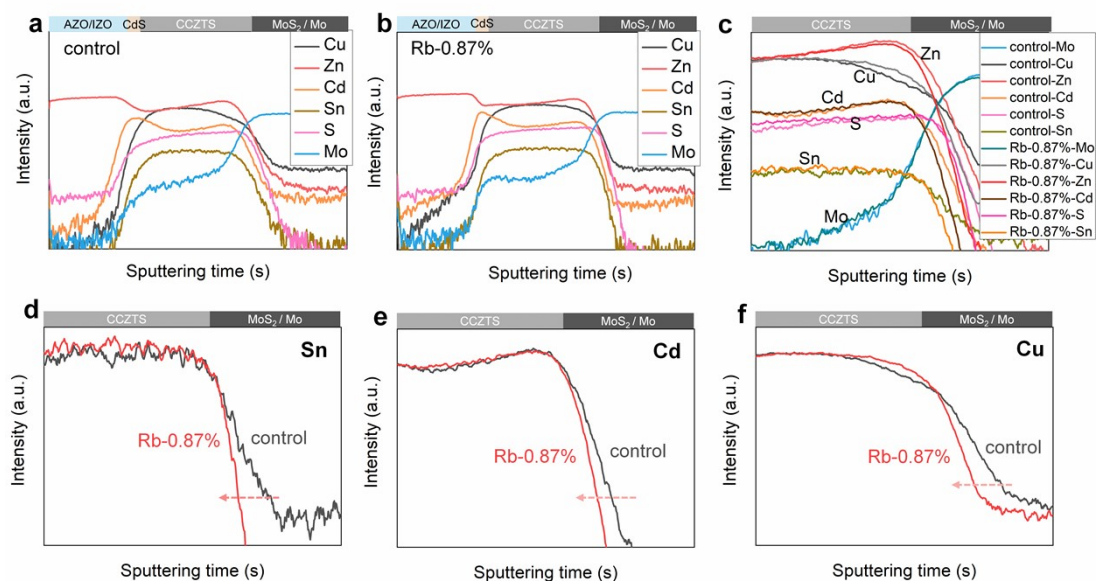

50

51 **Figure S5** Elemental distribution of Cu, Zn, Cd, Sn, S, and Mo in (a) “control” and (b) “Rb-0.87%”. An  
 52 enlarged plot at the rear interface for both cells: (c) all elements, (d) Sn, (e) Cd, and (f) Cu.

## 54 Performance boxplots

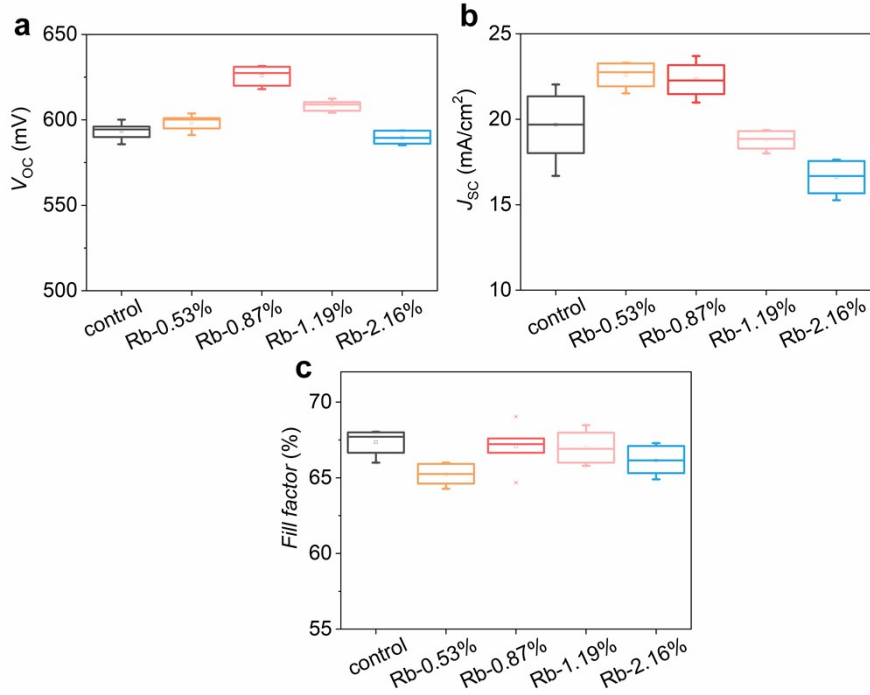

55

56 **Figure S6** Statistic boxplots of  $V_{OC}$ ,  $J_{SC}$ , and  $FF$  for the CCZTS thin-film solar cells prepared with an RbF

57 layer deposited from a Knudsen cell with varied doping concentration.

## 58 Urbach energy calculation

59 The value of Urbach energy ( $E_U$ ) derived from EQE response could characterize the band tail states of the  
60 CCZTS films, which provides an estimation of tail states by the following equation: <sup>16, 18</sup>

$$61 \ln(\text{EQE}) = c + hv/E_U \quad (1)$$

62 where  $c$  is a constant and  $hv$  is the bandgap energy.

64 **Dark  $J$ - $V$  measurement**

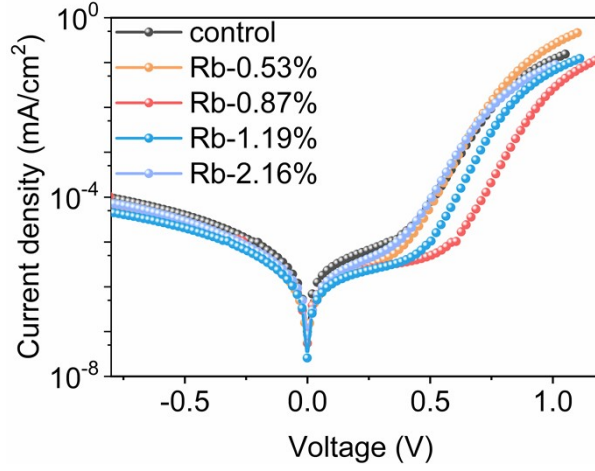

65

66 **Figure S7** Dark  $J$ - $V$  curves for the CCZTS thin-film solar cells prepared with an RbF layer deposited from  
 67 a Knudsen cell with varied doping concentration.

68 The diode quality factor ( $A$ ) and the reverse saturation current density ( $J_0$ ) could be estimated by the following  
 69 equation:

$$70 \ln J = \ln J_0 + \frac{qV}{AkBT}$$

71 (2)

72 where  $q$ ,  $k_B$ , and  $T$  are the elemental charge, Boltzmann constant, and temperature, respectively. According  
 73 to it,  $J_0$  can be derived by extending the fitting line in the graph to 0 V, and  $A$  can be calculated from the  
 74 slope of the curve. Quantitatively, the  $V_{OC}$  gain between two devices can be calculated using the following  
 75 equations:

$$76 V_{OC} = \frac{AkT}{q} \ln \left( 1 + \frac{J_{SC}}{J_0} \right) \approx \frac{AkT}{q} \ln \left( \frac{J_{SC}}{J_0} \right)$$

77 (3)

$$78 \Delta V_{OC} = \frac{AkT}{q} \ln \left( \frac{J_{SC}^{Rb-0.87\%}}{J_0^{Rb-0.87\%}} \times \frac{J_0^{control}}{J_{SC}^{control}} \right)$$

79 (4)



81 **C-V measurement**

82 From C-V measurement, the relation between junction width and the charge density can be extracted and the  
 83 built-in potential ( $V_{bi}$ ) according to the following equations:

84 
$$N_{C-V} = \frac{C^3}{qS^2\epsilon_0\epsilon_r} \left(\frac{dC}{dV}\right)^{-1}$$

85 (5)

86 
$$W_d = \frac{S\epsilon_0\epsilon_r}{C}$$

87 (6)

88 
$$\frac{1}{C^2} = \frac{2}{\epsilon_0\epsilon_r e S^2 N} (V_{bi} - V)$$

89 (7)

90 Here,  $C$ ,  $S$ ,  $V$ ,  $\epsilon_0$ ,  $\epsilon_r$ ,  $N$  and  $q$  are measured capacitance, effective area of the solar cell, positive/negative for  
 91 forward/reverse bias, and the vacuum permittivity, the relative dielectric constant of CCZTS film, the carrier  
 92 density, and elemental charge, respectively.

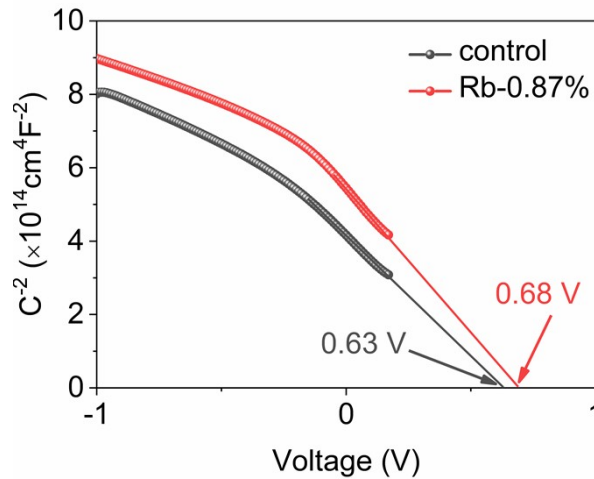

93

94 **Figure S8**  $C^{-2}$ -voltage curves for “control” and “Rb-0.87%”.

96 **Band offset measurement and calculation**

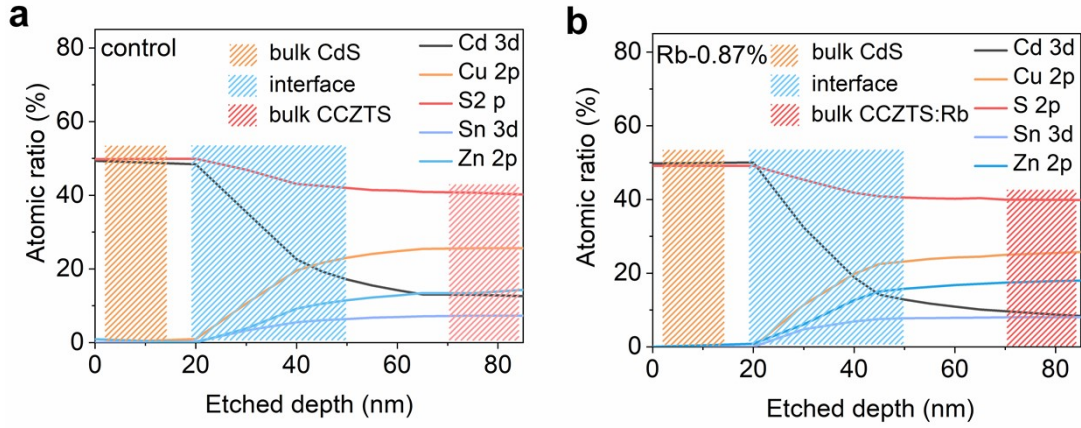

97

98 **Figure S9** XPS depth profile of Cu, Cd, Zn, Sn, and S at CdS/CCZTS:Rb interface starting from bulk CdS  
 99 into bulk CCZTS:Rb. The etched depth is referred to Ta<sub>2</sub>O<sub>5</sub> standard sample.

100 The elemental depth profiles of Cd, Cu, Zn, Sn, and S from CdS to CCZTS:Rb are detected by moderately  
 101 sputtering with Ar<sup>+</sup> ions (1000 eV). According to the composition variation, three areas (bulk CdS area,  
 102 interface area, and bulk CCZTS) area can be readily identified. With the known approach, the valence band  
 103 offset (VBO) and the conduction band offset (CBO) of the CCZTS/CdS heterojunction can be calculated as  
 104 shown below:<sup>19, 20</sup>

$$105 \quad VBO = E_{VBM}^{CdS} - E_{VBM}^{CCZTS} + \Delta E \quad (8)$$

$$106 \quad CBO = E_g^{CdS} - E_g^{CCZTS} - VBO \quad (9)$$

107 where  $E_{VBM}^{CdS}$ ,  $E_{VBM}^{CCZTS}$ ,  $\Delta E$ ,  $E_g^{CdS}$  and  $E_g^{CCZTS}$  are the positions of valence band edges of bulk CdS and bulk  
 108 CCZTS, band bending, the bandgap of CdS and CCZTS, respectively.

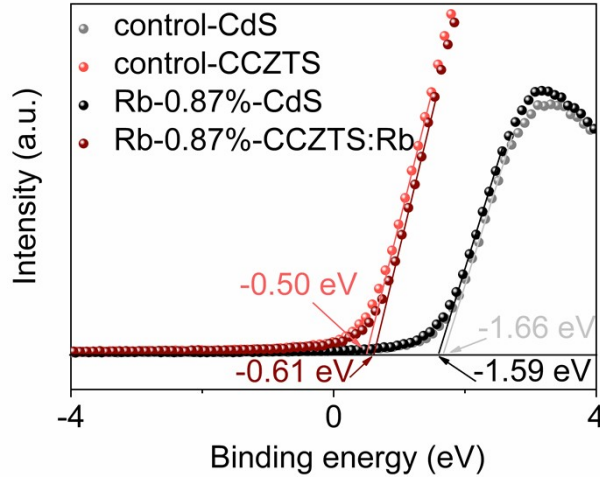

110

111 **Figure S10** The XPS valence band spectroscopy of the bulk CdS and bulk CCZTS or CCZTS:Rb for  
 112 “control” and “Rb-0.87%”. The negative sign means the position is lower than the Fermi level.

113 It is clear to see that the  $E_{VBM}$  (relative to Fermi level) of bulk CdS and bulk CCZTS:Rb are at -1.59 eV and  
 114 -0.61 eV, respectively, and that of bulk CdS and bulk CCZTS of “control” are at -1.66 eV and -0.50 eV,  
 115 respectively.

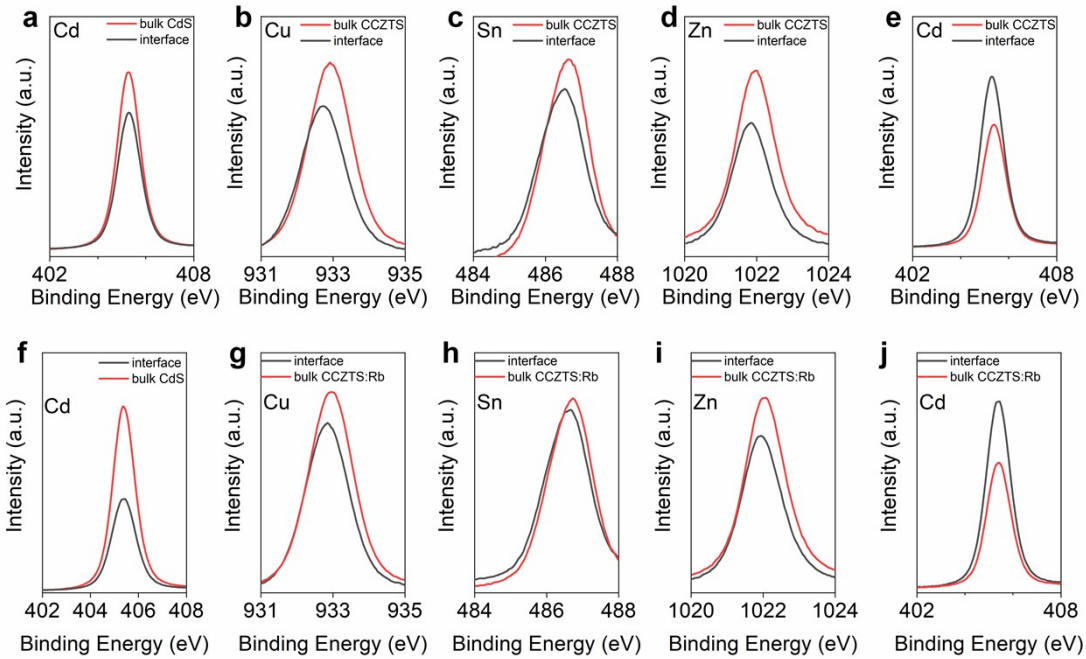

116

117 **Figure S11** The XPS peaks of the concerned element in the bulk and at the interface calibrated by C peak  
 118 (284.8 eV). (a-e) for “control”, and (f-j) for “Rb-0.87%”.

119 To calculate VBO,  $\Delta E$  appears ultimately necessary, which can be easily derived by the well-known formula:

$$120 \Delta E_{CL} = (\Delta E_{CL}^a - \Delta E_{CL}^a(i)) + (\Delta E_{CL}^b(i) - \Delta E_{CL}^b) \quad (10)$$

$$\Delta E = \frac{(\Delta E_{Cd/Cu} + \Delta E_{Cd/Zn} + \Delta E_{Cd/Cd} + \Delta E_{Cd/Sn})}{4}$$

122 (11)

123 where  $\Delta E_{CL}^a$  and  $\Delta E_{CL}^b$  are the core level energies of two selected elements in the bulk absorber (CCZTS or  
 124 CCZTS:Rb) and in the bulk buffer (CdS), and  $\Delta E_{CL}^a(i)$  and  $\Delta E_{CL}^b(i)$  are the core level energies of the  
 125 corresponding element at the interface. In the present case, the Cd is chosen in CdS and Cu, Zn, Cd, and Sn  
 126 are selected in CCZTS or CCZTS:Rb. The XPS peaks of each element in the bulk and at the interface are  
 127 plotted in **Figure S5**. These figures provide the peaks shift values of (Cd/Cu), (Cd/Zn), (Cd/Cd) and (Cd/Sn)  
 128 as discussed in the article. The associated values are summarized in **Table S4**.

129

130 **Table S4** XPS peak positions of all elements at the interface or in the bulk CdS and CCZTS films of “control”  
 131 and “Rb-0.87%” after calibration by C peak (284.8 eV).

| Samples    | location  | Cd 3d  | Cu 2p  | Sn 3d  | Zn 2p   |
|------------|-----------|--------|--------|--------|---------|
| “Rb-0.87%” | CdS       | 405.38 |        |        |         |
|            | interface | 405.38 | 932.83 | 486.58 | 1021.94 |
|            | CCZTS:Rb  | 405.39 | 932.94 | 486.68 | 1022.03 |
| control    | CdS       | 405.28 |        |        |         |
|            | interface | 405.29 | 932.71 | 486.47 | 1021.83 |
|            | CCZTS     | 405.38 | 932.91 | 486.61 | 1021.95 |

132 These data are extracted from **Figure S11** and used for calculating the band bending value. The values for  
 133 (Cd/Cu), (Cd/Zn), (Cd/Cd) and (Cd/Sn) in CCZTS:Rb are estimated to be 0.11 eV, 0.09 eV, 0.01 eV, and 0.1  
 134 eV, correspondingly, resulting in an overall average band bending value of 0.08 eV by using Equation (11).  
 135 With the same method, the bending for “control” is estimated to be 0.15 eV. The decreased  $\Delta E$  by Rb-doping  
 136 should be attributed to the reduced defect states in bulk or at the interface of CCZTS film.

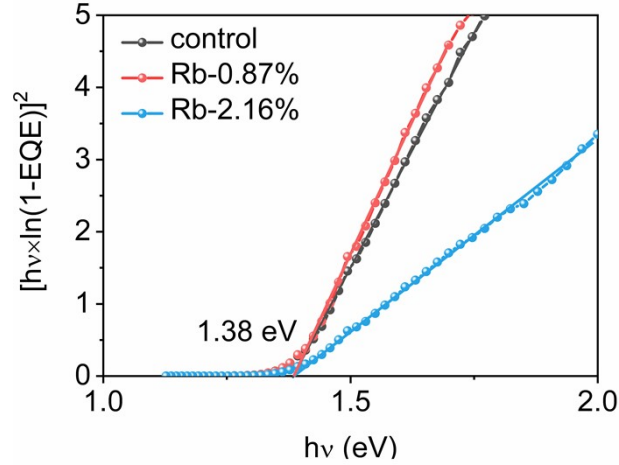

137

138 **Figure S12** Plot of  $[hv \times \ln(1-EQE)]^2$  versus  $h\nu$  of “control”, “Rb-0.87%”, and “Rb-2.16%”.

139 This plot gives information on the bandgap value of the absorber. The three absorbers share the same bandgap  
 140 with 1.38 eV, suggesting the Rb-doping in this work does not affect the bandgap. This may be explained by  
 141 the low Rb-doping concentration.

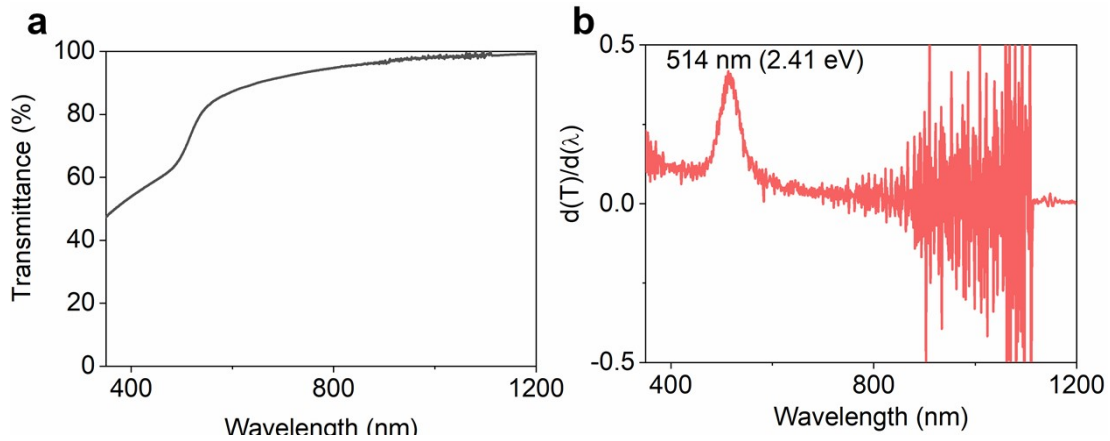

142

143 **Figure S13** (a) Transmittance spectra of CdS thin film directly deposited onto glass. (b) The plots of the  
 144 differential of the transmittance to wavelength versus wavelength.

145 The differential curve in (b) exhibits a peak located at 514 nm, suggesting there is a strong absorption peak  
 146 of CdS. Thus, the bandgap of CdS can be calculated to be 2.41 eV.

147 By combining the valence band edges of buffer and absorber, and the overall average band bending, the  
 148 valence band offset (VBO) at CCZTS/CdS and CCZTS:Rb/CdS interface can be calculated to be -1.01 eV  
 149 and -0.90 eV based on Equation (8). Therefore, the conduction band offset (CBO) can be derived to be 0.02  
 150 eV for CCZTS and 0.13 eV for CCZTS:Rb by Equation (9). Here, the bandgap of 1.38 eV for CCZTS film  
 151 and of 2.41 eV for CdS are used.

153 SEM images

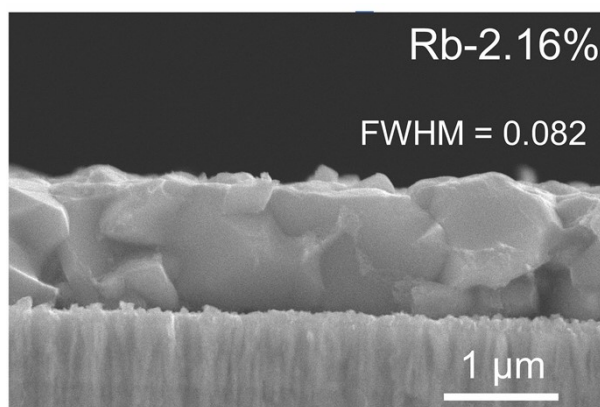

154

155 **Figure S14** Cross-view SEM image of “Rb-2.16%”.

156 The FWHM of absorber of “Rb-2.16%” is 0.82, lower than those of “control” and “Rb-0.87%”, suggesting  
157 the bulk crystallinity is improved under higher Rb-doping concentration.

158 EDX mapping

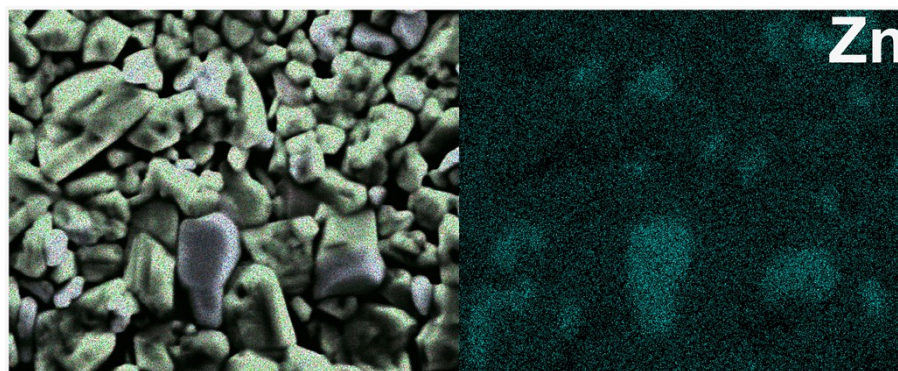

159

160 **Figure S15** (a) Top surface morphology and (b) EDX mapping of Zn element for “Rb-2.16%”.

161 One can notice that there are lots of Zn-related particles on the top surface of the absorber.

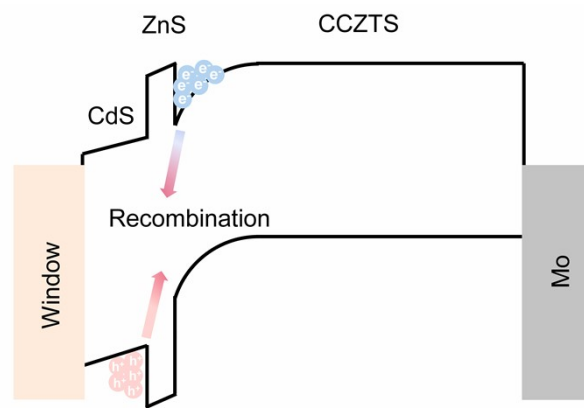

163

164 **Figure S16** Schematic diagram of the role of ZnS particles at the interface of CCZTS/CdS.

165 This schematic is used for analyzing the mechanism of the ZnS-induced interface recombination. It is well-

166 known that the ZnS is a high resistive semiconductor with higher CBM and lower VBM than those of CCZTS

167 and CdS. Thus, the ZnS at the interface will act as a barrier for electrons and hole transport. As described,

168 the electrons and holes will accumulate at the interface, leading to a high recombination.

## 170 References

- 171
- 172 1. Wu, Y.; Zhao, M.; Zhuang, D.; Zhang, N.; Yu, X.; Wei, Y.; Lyu, X.; Ren, G.; Wang, C.; Hu, L.,  
173 The effect of Rb doping on CZTSSe solar cells. *Solar Energy* **2019**, *187*, 269-273.
- 174 2. Altamura, G.; Wang, M.; Choy, K.-L., Influence of alkali metals (Na, Li, Rb) on the performance of  
175 electrostatic spray-assisted vapor deposited Cu<sub>2</sub>ZnSn (S, Se) 4 solar cells. *Scientific reports* **2016**, *6* (1),  
176 1-9.
- 177 3. Hsieh, Y. T.; Han, Q.; Jiang, C.; Song, T. B.; Chen, H.; Meng, L.; Zhou, H.; Yang, Y., Efficiency  
178 enhancement of Cu<sub>2</sub>ZnSn (S, Se) 4 solar cells via alkali metals doping. *Advanced Energy Materials* **2016**, *6*  
179 (7), 1502386.
- 180 4. Garud, S.; Vermang, B.; Sahayaraj, S.; Ranjbar, S.; Brammertz, G.; Meuris, M.; Smets, A.;  
181 Poortmans, J., Alkali Assisted Reduction of Open-Circuit Voltage Deficit in CZTSe Solar Cells. *physica*  
182 *status solidi c* **2017**, *14* (10), 1700171.
- 183 5. Schubert, B. A.; Marsen, B.; Cinque, S.; Unold, T.; Klenk, R.; Schorr, S.; Schock, H. W.,  
184 Cu<sub>2</sub>ZnSnS<sub>4</sub> thin film solar cells by fast coevaporation. *Progress in Photovoltaics: Research and Applications*  
185 **2011**, *19* (1), 93-96.
- 186 6. Wang, K.; Gunawan, O.; Todorov, T.; Shin, B.; Chey, S.; Bojarczuk, N.; Mitzi, D.; Guha, S.,  
187 Thermally evaporated Cu<sub>2</sub>ZnSnS<sub>4</sub> solar cells. *Applied Physics Letters* **2010**, *97* (14), 143508.
- 188 7. Shin, B.; Gunawan, O.; Zhu, Y.; Bojarczuk, N. A.; Chey, S. J.; Guha, S., Thin film solar cell with  
189 8.4% power conversion efficiency using an earth-abundant Cu<sub>2</sub>ZnSnS<sub>4</sub> absorber. *Progress in Photovoltaics:*  
190 *Research and Applications* **2013**, *21* (1), 72-76.
- 191 8. Cui, H.; Liu, X.; Song, N.; Li, N.; Liu, F.; Hao, X., Impact of rapid thermal annealing of Mo coated  
192 soda lime glass substrate on device performance of evaporated Cu<sub>2</sub>ZnSnS<sub>4</sub> thin film solar cells. *Materials*  
193 *Letters* **2014**, *125*, 40-43.
- 194 9. Zhang, L.; Karthikeyan, S.; Sibakoti, M. J.; Campbell, S. A. In *Cu<sub>2</sub>ZnSnS<sub>4</sub> thin film growth*  
195 *optimization and post rapid thermal annealing of solar cells and its influence on device performance*, 2015  
196 IEEE 42nd Photovoltaic Specialist Conference (PVSC), IEEE: 2015; pp 1-6.
- 197 10. Mise, T.; Tajima, S.; Fukano, T.; Higuchi, K.; Katagiri, H., Influence of chemical composition on  
198 the properties of directly coevaporated Cu–Zn–Sn–S-based thin films and solar cells. *Japanese Journal of*  
199 *Applied Physics* **2015**, *55* (1), 012303.
- 200 11. Mise, T.; Tajima, S.; Fukano, T.; Higuchi, K.; Washio, T.; Jimbo, K.; Katagiri, H., Improving the  
201 photovoltaic performance of co-evaporated Cu<sub>2</sub>ZnSnS<sub>4</sub> thin-film solar cells by incorporation of sodium from  
202 NaF layers. *Progress in Photovoltaics: Research and Applications* **2016**, *24* (7), 1009-1015.
- 203 12. Shimamune, Y.; Jimbo, K.; Nishida, G.; Murayama, M.; Takeuchi, A.; Katagiri, H., Cu<sub>2</sub>ZnSnS<sub>4</sub>  
204 formation by co-evaporation and subsequent annealing in S-flux using molecular beam epitaxy system. *Thin*  
205 *Solid Films* **2017**, *638*, 312-317.
- 206 13. Liu, L.; Lau, T. K.; Zhi, Z.; Huang, L.; Wang, S.; Xiao, X., Modification of Mo back contact with  
207 MoO<sub>3</sub>-x layer and its effect to enhance the performance of Cu<sub>2</sub>ZnSnS<sub>4</sub> solar cells. *Solar RRL* **2018**, *2* (12),  
208 1800243.
- 209 14. Baskaran, V.; Sakthivel, S., Current-voltage characteristics of Cu<sub>2</sub>ZnSnS<sub>4</sub> absorber layer for energy  
210 harvesting devices. *Materials Research Express* **2020**, *6* (12), 126333.
- 211 15. Huang, L.; Li, J.; Wang, S.; Zhong, L.; Xiao, X., Forming an ultrathin SnS Layer on Cu<sub>2</sub>ZnSnS<sub>4</sub>  
212 surface to achieve highly efficient solar cells with Zn (O, S) Buffer. *Solar RRL* **2020**, *4* (5), 2000010.
- 213 16. Huang, L.; Wang, S.; Zhong, L.; Chen, L.; Xiao, X., Role of ZnS Particles in the Performance of  
214 Cu<sub>2</sub>ZnSnS<sub>4</sub> Thin Film Solar Cells: A Comparative Study by Active Control of Zinc Deposition in  
215 Coevaporated Precursors. *Solar RRL* **2020**, *4* (11), 2000334.
- 216 17. Peksu, E.; Karaagac, H., Characterization of Cu<sub>2</sub>ZnSnS<sub>4</sub> thin films deposited by one-step thermal  
217 evaporation for a third generation solar cell. *Journal of Alloys and Compounds* **2021**, *862*, 158503.
- 218 18. Guchhait, A.; Su, Z.; Tay, Y. F.; Shukla, S.; Li, W.; Leow, S. W.; Tan, J. M. R.; Lie, S.; Gunawan,  
219 O.; Wong, L. H., Enhancement of open-circuit voltage of solution-processed Cu<sub>2</sub>ZnSnS<sub>4</sub> solar cells with  
220 7.2% efficiency by incorporation of silver. *ACS Energy Letters* **2016**, *1* (6), 1256-1261.
- 221 19. Santoni, A.; Biccari, F.; Malerba, C.; Valentini, M.; Chierchia, R.; Mittiga, A., Valence band offset  
222 at the CdS/Cu<sub>2</sub>ZnSnS<sub>4</sub> interface probed by x-ray photoelectron spectroscopy. *Journal of Physics D: Applied*  
223 *Physics* **2013**, *46* (17), 175101.
- 224 20. Klein, A.; Löher, T.; Tomm, Y.; Pettenkofer, C.; Jaegermann, W., Band lineup between CdS and  
225 ultra high vacuum-cleaved CuInS<sub>2</sub> single crystals. *Applied physics letters* **1997**, *70* (10), 1299-1301.
- 226
